# Supplementary material
Source: PubMed Central journal article supplement (PMC5750108)
Supplement: NIHMS894082-supplement-1.pdf [file NIHMS894082-supplement-1.pdf]

**Supplementary Appendix for the article**

**Injectable naltrexone, oral naltrexone, and buprenorphine/naloxone utilization and discontinuation among individuals treated for opioid use disorder in a United States commercially insured population**

MORGAN Jake R., MS<sup>1</sup>

SCHACKMAN Bruce R., PhD<sup>2</sup>

LEFF Jared A., MS<sup>2</sup>

LINAS Benjamin P., MD, MPH<sup>1,3</sup>

WALLEY Alexander Y., MD, MSc<sup>4</sup>

Department of Medicine, Section of Infectious Diseases, Boston Medical Center,<sup>1</sup> Boston, MA, USA;

Department of Healthcare Policy & Research, Weill Cornell Medical College,<sup>2</sup> New York, NY, USA;

Department of Epidemiology, Boston University School of Public Health,<sup>3</sup> Boston, MA, USA;

Department of Medicine, Section of General Internal Medicine, Boston Medical Center,<sup>4</sup> Boston, MA, USA

**Supplemental Table 1: NDC codes for OUD treatment**

| <b>OUD treatment</b>  | <b>NDC Codes</b>       |               |               |               |
|-----------------------|------------------------|---------------|---------------|---------------|
| Injectable naltrexone | 65757-0300-01          |               |               |               |
| Oral naltrexone       | 52372-0751-01          | 62991-1243-01 | 00185-0039-01 |               |
|                       | 52372-0751-03          | 62991-1243-04 | 49452-4835-01 |               |
|                       | 52372-0751-02          | 62991-1243-02 | 49452-4835-05 |               |
|                       | 54868-5574-00          | 63370-0158-25 | 49452-4835-03 |               |
|                       | 16729-0081-01          | 63370-0158-10 | 49452-4835-02 |               |
|                       | 16729-0081-10          | 63370-0158-35 | 47335-0326-88 |               |
|                       | 52152-0105-02          | 63370-0158-15 | 47335-0326-83 |               |
|                       | 52152-0105-30          | 00406-1170-01 | 51224-0206-30 |               |
|                       | 68084-0291-11          | 00406-1170-03 | 51224-0206-50 |               |
|                       | 68084-0291-21          | 38779-0887-04 | 00555-0902-02 |               |
|                       | 52152-0105-04          | 38779-0887-08 | 00555-0902-01 |               |
|                       | 42291-0632-30          | 38779-0887-05 | 50436-0105-01 |               |
|                       | 63275-9901-01          | 38779-0887-06 | 00056-0011-30 |               |
|                       | 63275-9901-03          | 38779-0887-03 | 00056-0011-70 |               |
|                       | 63275-9901-02          | 43063-0591-15 | 00056-0011-22 |               |
|                       | 63275-9901-05          | 68094-0853-62 | 00056-0079-50 |               |
|                       | 63275-9901-04          | 51927-3602-00 | 51285-0275-01 |               |
|                       | 68115-0680-30          | 51927-2753-00 | 51285-0275-02 |               |
|                       | 65694-0100-10          | 51927-4377-00 | 00056-0080-50 |               |
|                       | 65694-0100-03          | 00185-0039-30 | 62991-1243-03 |               |
|                       | Buprenorphine/naloxone | 54569-6408-00 | 63629-4034-03 | 54868-5707-04 |
|                       |                        | 00228-3154-03 | 63629-4034-02 | 54868-5707-01 |
|                       |                        | 00228-3155-03 | 63629-4034-01 | 54868-5707-02 |
| 00228-3154-73         |                        | 55887-0312-04 | 54868-5707-03 |               |
| 00228-3155-73         |                        | 55887-0312-15 | 54868-5707-00 |               |
| 53217-0138-30         |                        | 55045-3784-03 | 54868-5750-00 |               |
| 65162-0416-03         |                        | 68258-2999-03 | 35356-0004-07 |               |
| 65162-0415-03         |                        | 66336-0015-30 | 55700-0147-30 |               |
| 42291-0175-30         |                        | 66336-0016-30 | 35356-0004-30 |               |
| 42291-0174-30         |                        | 12496-1202-03 | 49999-0395-30 |               |
| 60429-0587-30         |                        | 12496-1208-03 | 49999-0395-15 |               |
| 60429-0586-30         |                        | 12496-1208-01 | 49999-0395-07 |               |
| 50383-0287-93         |                        | 12496-1202-01 | 12496-1283-02 |               |
| 50383-0294-93         |                        | 12496-1204-03 | 12496-1306-02 |               |
| 00406-1924-03         |                        | 12496-1212-01 | 00490-0051-60 |               |
| 00406-1923-03         |                        | 12496-1212-03 | 00490-0051-30 |               |
| 55700-0184-30         |                        | 12496-1204-01 | 00490-0051-90 |               |
| 00093-5721-56         |                        | 68071-1510-03 | 00490-0051-00 |               |
| 00093-5720-56         |                        | 68071-1380-03 | 16590-0666-30 |               |
| 00054-0188-13         |                        | 23490-9270-09 | 16590-0667-90 |               |
| 00054-0189-13         |                        | 23490-9270-06 | 16590-0667-05 |               |
| 54569-6399-00         |                        | 23490-9270-03 | 16590-0667-30 |               |
| 54569-5496-00         |                        | 43063-0184-07 | 16590-0666-05 |               |
| 54569-5739-01         |                        | 43063-0184-30 | 54123-0986-30 |               |
| 54569-5739-00         |                        | 52959-0749-30 | 54123-0929-30 |               |
| 54569-5739-02         |                        | 52959-0304-30 | 54123-0114-30 |               |
| 63874-1084-03         |                        | 54123-0914-30 | 54123-0957-30 |               |
| 63874-1085-03         |                        |               |               |               |

NDC = national drug code; OUD = opioid use disorder

**Supplemental Table 2: ICD-9 codes identifying substance use disorder**

| <b>Substance use disorder diagnoses</b> | <b>ICD-9 Code</b> | <b>ICD-9 code description</b>                                                 |
|-----------------------------------------|-------------------|-------------------------------------------------------------------------------|
| Opioid                                  | 304.00            | Opioid type dependence, unspecified                                           |
| Opioid                                  | 304.01            | Opioid type dependence, continuous                                            |
| Opioid                                  | 304.02            | Opioid type dependence, episodic                                              |
| Opioid                                  | 304.03            | Opioid type dependence, in remission                                          |
| Opioid                                  | 304.70            | Combinations of opioid type drug with any other drug dependence, unspecified  |
| Opioid                                  | 304.71            | Combinations of opioid type drug with any other drug dependence, continuous   |
| Opioid                                  | 304.72            | Combinations of opioid type drug with any other drug dependence, episodic     |
| Opioid                                  | 304.73            | Combinations of opioid type drug with any other drug dependence, in remission |
| Opioid                                  | 305.50            | Opioid abuse, unspecified                                                     |
| Opioid                                  | 305.51            | Opioid abuse, continuous                                                      |
| Opioid                                  | 305.52            | Opioid abuse, episodic                                                        |
| Opioid                                  | 305.53            | Opioid abuse, in remission                                                    |
| Alcohol                                 | 265.20            | Pellagra                                                                      |
| Alcohol                                 | 291.1             | Alcohol-induced persisting amnestic disorder                                  |
| Alcohol                                 | 291.2             | Alcohol-induced persisting dementia                                           |
| Alcohol                                 | 291.3             | Alcohol-induced psychotic disorder with hallucinations                        |
| Alcohol                                 | 291.4             | Idiosyncratic alcohol intoxication                                            |
| Alcohol                                 | 291.5             | Alcohol-induced psychotic disorder with delusions                             |
| Alcohol                                 | 291.89            | Other alcohol-induced mental disorders                                        |
| Alcohol                                 | 303.00            | Acute alcoholic intoxication in alcoholism, unspecified                       |
| Alcohol                                 | 303.01            | Acute alcoholic intoxication in alcoholism, continuous                        |
| Alcohol                                 | 303.02            | Acute alcoholic intoxication in alcoholism, episodic                          |
| Alcohol                                 | 303.03            | Acute alcoholic intoxication in alcoholism, in remission                      |
| Alcohol                                 | 303.90            | Other and unspecified alcohol dependence, unspecified                         |
| Alcohol                                 | 303.91            | Other and unspecified alcohol dependence, continuous                          |
| Alcohol                                 | 303.92            | Other and unspecified alcohol dependence, episodic                            |
| Alcohol                                 | 303.93            | Other and unspecified alcohol dependence, in remission                        |
| Alcohol                                 | 305.00            | Alcohol abuse, unspecified                                                    |
| Alcohol                                 | 305.01            | Alcohol abuse, continuous                                                     |
| Alcohol                                 | 305.02            | Alcohol abuse, episodic                                                       |
| Alcohol                                 | 305.03            | Alcohol abuse, in remission                                                   |
| Alcohol                                 | 357.5             | Alcoholic polyneuropathy                                                      |
| Alcohol                                 | 425.5             | Alcoholic cardiomyopathy                                                      |
| Alcohol                                 | 535.30            | Alcoholic gastritis, without mention of hemorrhage                            |
| Alcohol                                 | 535.31            | Alcoholic gastritis, with hemorrhage                                          |
| Alcohol                                 | 571.0             | Alcoholic fatty liver                                                         |
| Alcohol                                 | 571.1             | Acute alcoholic hepatitis                                                     |
| Alcohol                                 | 571.2             | Alcoholic cirrhosis of liver                                                  |

|                |        |                                                                   |
|----------------|--------|-------------------------------------------------------------------|
| Alcohol        | 571.3  | Alcoholic liver damage, unspecified                               |
| Alcohol        | 980.0  | Toxic effect of ethyl alcohol                                     |
| Alcohol        | 980.1  | Toxic effect of methyl alcohol                                    |
| Alcohol        | 980.2  | Toxic effect of isopropyl alcohol                                 |
| Alcohol        | 980.3  | Toxic effect of fusel oil                                         |
| Alcohol        | 980.8  | Toxic effect of other specified alcohols                          |
| Alcohol        | 980.9  | Toxic effect of unspecified alcohol                               |
| Alcohol        | V113   | Personal history of alcoholism                                    |
| Amphetamine    | 304.40 | Amphetamine and other psychostimulant dependence, unspecified     |
| Amphetamine    | 304.41 | Amphetamine and other psychostimulant dependence, continuous      |
| Amphetamine    | 304.42 | Amphetamine and other psychostimulant dependence, episodic        |
| Amphetamine    | 304.43 | Amphetamine and other psychostimulant dependence, in remission    |
| Amphetamine    | 305.70 | Amphetamine or related acting sympathomimetic abuse, unspecified  |
| Amphetamine    | 305.71 | Amphetamine or related acting sympathomimetic abuse, continuous   |
| Amphetamine    | 305.72 | Amphetamine or related acting sympathomimetic abuse, episodic     |
| Amphetamine    | 305.73 | Amphetamine or related acting sympathomimetic abuse, in remission |
| Antidepressant | 305.80 | Antidepressant type abuse, unspecified                            |
| Antidepressant | 305.81 | Antidepressant type abuse, continuous                             |
| Antidepressant | 305.82 | Antidepressant type abuse, episodic                               |
| Antidepressant | 305.83 | Antidepressant type abuse, in remission                           |
| Cannabis       | 304.30 | Cannabis dependence, unspecified                                  |
| Cannabis       | 304.31 | Cannabis dependence, continuous                                   |
| Cannabis       | 304.32 | Cannabis dependence, episodic                                     |
| Cannabis       | 304.33 | Cannabis dependence, in remission                                 |
| Cannabis       | 305.20 | Cannabis abuse, unspecified                                       |
| Cannabis       | 305.21 | Cannabis abuse, continuous                                        |
| Cannabis       | 305.22 | Cannabis abuse, episodic                                          |
| Cannabis       | 305.23 | Cannabis abuse, in remission                                      |
| Cocaine        | 304.20 | Cocaine dependence, unspecified                                   |
| Cocaine        | 304.21 | Cocaine dependence, continuous                                    |
| Cocaine        | 304.22 | Cocaine dependence, episodic                                      |
| Cocaine        | 304.23 | Cocaine dependence, in remission                                  |
| Cocaine        | 305.60 | Cocaine abuse, unspecified                                        |
| Cocaine        | 305.61 | Cocaine abuse, continuous                                         |
| Cocaine        | 305.61 | Cocaine abuse, episodic                                           |
| Cocaine        | 305.63 | Cocaine abuse, in remission                                       |
| Hallucinogen   | 304.50 | Hallucinogen dependence, unspecified                              |
| Hallucinogen   | 304.51 | Hallucinogen dependence, continuous                               |
| Hallucinogen   | 304.52 | Hallucinogen dependence, episodic                                 |
| Hallucinogen   | 304.53 | Hallucinogen dependence, in remission                             |
| Hallucinogen   | 305.30 | Hallucinogen abuse, unspecified                                   |
| Hallucinogen   | 305.31 | Hallucinogen abuse, continuous                                    |
| Hallucinogen   | 305.32 | Hallucinogen abuse, episodic                                      |
| Hallucinogen   | 305.33 | Hallucinogen abuse, in remission                                  |
| Sedative       | 304.10 | Sedative, hypnotic or anxiolytic dependence, unspecified          |

|          |        |                                                           |
|----------|--------|-----------------------------------------------------------|
| Sedative | 304.11 | Sedative, hypnotic or anxiolytic dependence, continuous   |
| Sedative | 304.12 | Sedative, hypnotic or anxiolytic dependence, episodic     |
| Sedative | 304.13 | Sedative, hypnotic or anxiolytic dependence, in remission |
| Sedative | 305.40 | Sedative, hypnotic or anxiolytic abuse, unspecified       |
| Sedative | 305.41 | Sedative, hypnotic or anxiolytic abuse, continuous        |
| Sedative | 305.42 | Sedative, hypnotic or anxiolytic abuse, episodic          |
| Sedative | 305.43 | Sedative, hypnotic or anxiolytic abuse, in remission      |

---

**Supplemental Table 3: Logistic regression predicting OUD-treatment among OUD-diagnosed individuals**

| Parameter                | Adjusted Odds Ratio | 95% Confidence Interval |
|--------------------------|---------------------|-------------------------|
| <i>Sex</i>               |                     |                         |
| Male                     |                     | Reference               |
| Female                   | 0.866               | 0.845 - 0.886           |
| <i>Age</i>               |                     |                         |
| Less than 30             | 1.805               | 1.762 - 1.850           |
| 30 or older              |                     | Reference               |
| <i>Regions</i>           |                     |                         |
| Northeast                |                     | Reference               |
| Midwest                  | 1.269               | 1.226 - 1.313           |
| South                    | 1.038               | 1.006 - 1.071           |
| West                     | 1.056               | 1.018 - 1.096           |
| Unknown                  | 1.185               | 1.105 - 1.270           |
| <i>Health plan types</i> |                     |                         |
| PPO                      |                     | Reference               |
| HMO                      | 1.140               | 1.098 - 1.184           |
| POS                      | 1.106               | 1.054 - 1.161           |
| Other                    | 0.958               | 0.93 - 0.986            |
| <i>Substance codes</i>   |                     |                         |
| Alcohol                  | 1.255               | 1.167 - 1.351           |
| Amphetamines             | 1.218               | 1.159 - 1.281           |
| Antidepressants          | 1.171               | 0.936 - 1.463           |
| Cannabis                 | 1.247               | 1.206 - 1.289           |
| Cocaine                  | 1.352               | 1.298 - 1.409           |
| Hallucinogens            | 0.894               | 0.797 - 1.002           |
| Sedative                 | 1.603               | 1.552 - 1.656           |

OUD = opioid use disorder; HMO = health maintenance organization; PPO = preferred provider organization; POS = point of service

**Supplemental Table 4: Full cox model results**

| <b>Parameter</b>                           | <b>Hazard Ratio</b> | <b>95% CI</b> | <b>p-value</b> |
|--------------------------------------------|---------------------|---------------|----------------|
| <i>Medication at initiation</i>            |                     |               |                |
| Injectable naltrexone > 30 days            | 2.63                | 2.48-2.80     | <0.001         |
| Oral naltrexone >30 days                   | 2.70                | 2.60-2.80     | <0.001         |
| Buprenorphine/naloxone                     |                     | Reference     |                |
| <i>Medication at initiation control</i>    |                     |               |                |
| Injectable naltrexone ≤ 30 days            | 0.03                | 0.02-0.04     | <0.001         |
| Oral naltrexone ≤ 30 days                  | 0.19                | 0.17-0.20     | <0.001         |
| <i>Age at initiation</i>                   |                     |               |                |
| Younger than 30                            | 1.27                | 1.24-1.3      | <0.001         |
| 30 or older                                |                     | Reference     |                |
| <i>Sex</i>                                 |                     |               |                |
| Male                                       |                     | Reference     |                |
| Female                                     | 1.05                | 1.02-1.07     | <0.001         |
| <i>Polysubstance codes</i>                 |                     |               |                |
| Alcohol                                    | 1.16                | 1.09-1.24     | <0.001         |
| Amphetamines                               | 1.03                | 0.99-1.08     | 0.153          |
| Antidepressants                            | 1.14                | 0.94-1.38     | 0.199          |
| Cannabis                                   | 1.09                | 1.06-1.13     | <0.001         |
| Cocaine                                    | 1.10                | 1.06-1.14     | <0.001         |
| Hallucinogens                              | 1.07                | 0.97-1.19     | 0.182          |
| Sedative                                   | 1.13                | 1.10-1.16     | <0.001         |
| <i>Ever seen in detox facility</i>         |                     |               |                |
| Yes                                        | 0.88                | 0.86-0.91     | <0.001         |
| No                                         |                     | Reference     |                |
| <i>Provider at initiation (indicators)</i> |                     |               |                |
| Internal medicine                          | 0.99                | 0.96-1.02     | 0.497          |
| Family practice                            | 0.92                | 0.89-0.95     | <0.001         |
| Pediatrics                                 | 0.88                | 0.77-1.00     | 0.051          |
| Psychiatry                                 | 0.94                | 0.91-0.97     | <0.001         |
| Obstetrics and Gynecology                  | 1.03                | 0.91-1.16     | 0.649          |
| Surgery                                    | 1.13                | 0.99-1.29     | 0.074          |
| <i>Place of initiation (indicators)</i>    |                     |               |                |
| Office visit                               | 0.94                | 0.91-0.97     | <0.001         |
| Outpatient clinic                          | 1.08                | 1.05-1.12     | <0.001         |
| ER                                         | 1.24                | 1.15-1.35     | <0.001         |
| Inpatient                                  | 1.23                | 1.14-1.32     | <0.001         |
| <i>Region (reference Northeast)</i>        |                     |               |                |
| Midwest                                    | 1.07                | 1.02-1.10     | <0.001         |
| South                                      | 1.06                | 1.03-1.10     | <0.001         |
| West                                       | 1.25                | 1.21-1.30     | <0.001         |
| Unknown                                    | 0.72                | 0.67-0.78     | <0.001         |
| <i>Insurance (reference PPO)</i>           |                     |               |                |

| <b>Parameter</b> | <b>Hazard Ratio</b> | <b>95% CI</b> | <b>p-value</b> |
|------------------|---------------------|---------------|----------------|
| HMO              | 1.06                | 1.02-1.10     | 0.001          |
| POS              | 0.97                | 0.93-1.02     | 0.229          |
| Other Insurance  | 1.03                | 1.00-1.06     | 0.036          |

CI = confidence interval; ER = emergency room; HMO = health maintenance organization; PPO = preferred provider organization; POS = point of service
